# Supplementary material for: Reversible photoisomerization of azobenzene molecules on a single gold nanoparticle surface
Source: Royal Society of Chemistry journal article supplement (doi:10.1039/c5cc10468h), 2016-01-01
Supplement: c5cc10468h1.pdf [file c5cc10468h1.pdf]

**†The Supplementary Data of**

**Reversible Photoisomerization of Azobenzene Molecules on Single Gold  
Nanoparticle Surface**

**Heng Song, Chao Jing, Wei Ma, Tao Xie, Yi-Tao Long\***

*Key Laboratory for Advanced Materials & Department of Chemistry, East China University of  
Science and Technology, 130 Meilong Road, Shanghai, 200237, China.*

*\*E-mail: ytlong@ecust.edu.cn*

**Contents list:**

**S-1. Experimental section**

**S-2. Calculated Spectra of mix SAMs n-C<sub>4</sub>H<sub>9</sub>SH/CF<sub>3</sub>AzoSH modified gold Nanoparticle**

**S-3. Figure S 1-11**

## S-1 Experimental section

### Chemicals, Materials and Instrumentations

*Materials:* All the chemicals were of analytic grade and used as received. All solutions were prepared with ultrapure water (18 MΩ cm) from a Millipore system. <sup>1</sup>H NMR and <sup>13</sup>C NMR were acquired on BRUKER AVANCE 500 spectrometer using TMS as an internal standard. HRMS were obtained on HP5989 mass spectrometer.

#### Synthesis of 4-(4-trifluoromethyl-phenylazo)-phenol (1)

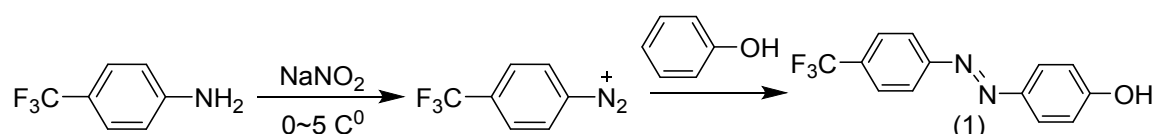

Compound (1) was synthesized according to the literature,<sup>1</sup> the crude product was used without further purification for the next step.

#### Synthesis of [4-(10-bromo-decyloxy)-phenyl]-(4-trifluoromethyl-phenyl)-diazene (2)

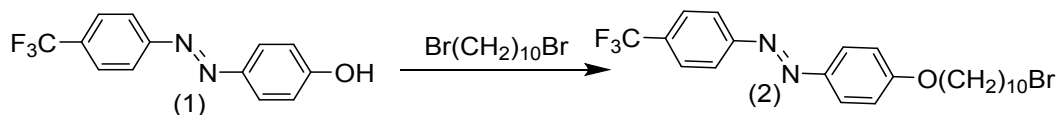

Compound (2) was synthesized according to the literature.<sup>2</sup> <sup>1</sup>H-NMR (400 MHz, CDCl<sub>3</sub>): δ (ppm) 1.32-1.50 (12H, m, [CH<sub>2</sub>]<sub>4</sub>), 1.84 (4H, m, [CH<sub>2</sub>]<sub>2</sub>), 3.42 (2H, t, CH<sub>2</sub>Br), 4.06 (2H, t, CH<sub>2</sub>O), 7.02 (2H, d, ArH ortho to phenolic group), 7.75 (2H, d, ArH ortho to CF<sub>3</sub>) and 7.93-7.96 (4H, m, ArH ortho to -N=N-).

#### Synthesis of 10-[4-(4-trifluoromethyl-phenylazo)-phenoxy]-decane-1-thiol (3)

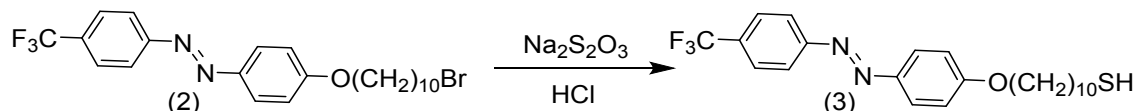

Compound (3) was synthesized according to the literature.<sup>3</sup> <sup>1</sup>H-NMR (400 MHz, CDCl<sub>3</sub>): δ (ppm) 1.31-1.52 (12H, m, [CH<sub>2</sub>]<sub>4</sub>), 1.58-1.65 (2H, m, CH<sub>2</sub>), 1.79-1.85 (2H, m, CH<sub>2</sub>), 2.52 (d t, 2H, SCH<sub>2</sub>), 4.06 (2H, t, CH<sub>2</sub>O), 7.02 (2H, m, ArH ortho to phenolic group), 7.75 (2H, d, ArH ortho to CF<sub>3</sub>) and 7.92-7.96 (4H, m, ArH ortho to -N=N-). ESI-MS: m/z 439.81 [MH<sup>+</sup>].

#### Synthesis of 10-(4-phenylazo-phenoxy)-decane-1-thiol

The same procedures were used to synthesize 10-(4-phenylazo-phenoxy)-decane-1-thiol (termed AzoSH). <sup>1</sup>H-NMR (400 MHz, CDCl<sub>3</sub>): δ (ppm) 1.45-1.84 (16H, m, [CH<sub>2</sub>]<sub>8</sub>), 2.52 (dt, 2H, SCH<sub>2</sub>), 4.04 (2H, t, CH<sub>2</sub>O), 7.01 (2H, d), 7.47 (3H, m) and 7.90 (4H, m). HESI-MS: m/z 371.2233 [MH<sup>+</sup>].

#### Synthesis of 60 nm gold nanoparticles

50 mL of 0.01 wt% HAuCl<sub>4</sub> was heated to reflux with vigorous stirring and then 5 mL sodium citrate (38.8 mM) was added quickly to the solution. The mixed solution was continued to heat for 15 min, stopped heating and kept stirring for an additional 15 min. The resulting solution of colloidal particles was filtered and characterized by an absorption maximum at 519 nm using an Ocean optical USB 2000+ UV-Vis spectrometer. These particles were then used as seed particles for the synthesis of 60 nm gold particles. To 25 mL of water, 1 mL of preformed seed gold particles and 100  $\mu$ L of 0.2 M NH<sub>2</sub>OH·HCl was mixed. The mixture was stirred vigorously at room temperature and 3.0 mL of 0.1 wt% HAuCl<sub>4</sub>·3H<sub>2</sub>O was added drop-wise. Diameters were characterized by UV-Vis and SEM.

#### ***Modification Procedure of mix SAMs n-C<sub>4</sub>H<sub>9</sub>SH /CF<sub>3</sub>AzoSH on GNPs surface***

ITO slides surfaces were cleaned by rinsing the slides with soapy water, acetone, ethanol, distilled water, respectively. The cleaned slides were dried, and immersed in a dilution 40 times of aqueous gold nanoparticle (60 nm) solution for 4 min. Then the GNPs modified ITO slides were dipped in a solution of the n-C<sub>4</sub>H<sub>9</sub>SH (10  $\mu$ M in ethanol) for 5 minutes, rinsed extensively with ethanol. After that, the obtained substrate were immersed into the solution of CF<sub>3</sub>AzoSH (10  $\mu$ M in ethanol) for 24 hours, then sufficient rinsed with ethanol and dried under a stream of high-purity nitrogen.

#### ***Single nanoparticle DFM imaging and scattering spectroscopy measurements***

The dark-field measurements were carried out on an inverted microscope (eclipse Ti-U, Nikon, Japan) equipped with a dark-field condenser (0.8 <NA<0.95) and a 40 $\times$  objective lens (NA=0.8). The GNPs functionalized ITO slides were immobilized on a platform, and a white light source (100 W halogen lamp) was used to excite GNPs and generate plasmon resonance scattering light. The scattered light was split by a monochromator (Acton SP2300i, PI, USA) that was equipped with a grating (grating density: 300 lines/mm; blazed wavelength: 500 nm) and recorded by a spectrograph CCD (CASCADE 512B, Roper Scientific, PI, USA) to generate the scattering spectra. The scattering spectra from individual nanoparticle were corrected by subtracting the background spectra taken from the adjacent regions without GNPs and dividing with the calibrated response curve of the entire optical system.

#### ***The SERS sample prepared procedure and SERS spectroscopy measurements***

To prepare the SERS sample, Au NPs were first functionalized via a 5 min incubation with 10 mM C<sub>4</sub>H<sub>9</sub>SH and then washed three times to remove excess C<sub>4</sub>H<sub>9</sub>SH. After that, Au NPs/C<sub>4</sub>H<sub>9</sub>SH were functionalized with CF<sub>3</sub>AzoSH via 24 h incubation with 10 mM solution of CF<sub>3</sub>AzoSH at ambient temperature. The excess CF<sub>3</sub>AzoSH was removed through centrifugation and subsequent washing (three times). The SERS spectroscopy tests were performed similar as our published method<sup>4</sup>

## S-2 Calculated Spectra of mix SAMs n-C<sub>4</sub>H<sub>9</sub>SH/CF<sub>3</sub>AzoSH modified gold Nanoparticle

In order to farther prove the scattering spectra reversible shift of mix SAMs n-C<sub>4</sub>H<sub>9</sub>SH/CF<sub>3</sub>AzoSH modified GNP was caused by CF<sub>3</sub>AzoSH molecules reversible photoisomerize on GNP surface, discrete dipole approximation (DDA) is adopted to simulate the scattering efficiency of gold nanoparticle. For this calculation, a DDA code developed by Draine and Flatau is performed to characterize the core-shell case with a finite target. In spite of the complex electric field, incident wave is regard as a deformation of the monochromatic electromagnetic field unless stated otherwise. The propagation direction of the incident light is assumed to be perpendicular to the x-axis of the nanoparticle. The target type is specified by CONELLIPS in ddscat.par and considered to have a geometry of a gold core with mix SAM n-C<sub>4</sub>H<sub>9</sub>SH/CF<sub>3</sub>AzoSH shell. We considered spheres with a gold core of radius  $R = 30$  nm, a dielectric shell of thickness  $t = 25.2$  Å (according to the chemdraw stimulation of CF<sub>3</sub>AzoSH molecule length), and refractive index  $n$  of dielectric shell was related to the shell compositions, refractive index of CF<sub>3</sub>AzoSH and C<sub>4</sub>H<sub>9</sub>SH/H<sub>2</sub>O molecule were expected to be  $n_1 = 1.55$ ,  $n_2 = 1.33$  respectively.

$$n = \frac{n_1 V_1 + n_2 V_2}{V_1 + V_2} \quad (\text{Equation S1})$$

$$V = \frac{4\pi((R + t)^3 - R^3)}{3} \quad (\text{Equation S2})$$

Based on the surface areas of CF<sub>3</sub>AzoSH molecule and GNP, the average number of CF<sub>3</sub>AzoSH molecules per GNP could be calculated to be  $3 \times 10^4$ , beside, the volume of CF<sub>3</sub>AzoSH molecule was  $123$  Å<sup>3</sup> (according to the chemdraw3D stimulation data). The volume of the CF<sub>3</sub>AzoSH molecules on single GNP surface  $V_1 = 3690$  nm<sup>3</sup> and volume of the shell  $V_1 + V_2 = 7201.53094$  nm<sup>3</sup>. According to the above equations, the initial refractive index  $n$  of dielectric shell was 1.44435133. When exposure to UV irradiation, the CF<sub>3</sub>AzoSH molecules on GNP surface transformed from *trans* to *cis*, the volume of the shell  $V_1 + V_2$  was changed to  $5584.02538$  nm<sup>3</sup>, which increased the refractive index  $n$  of dielectric shell to 1.47650849.

## Reference

- 1 X. Chen, L. Wang, C. Li, J. Xiao, H. Ding, X. Liu, X. Zhang, W. He and H. Yang, *Chem. Commun.*, 2013, **49**, 10097–10099.
- 2 C.-W. Tseng, D.-C. Huang and Y.-T. Tao, *ACS Appl. Mater. Interfaces*, 2013, **5**, 9528–9536.
- 3 H. Wolf, H. Ringsdorf, E. Delamarche, T. Takami, H. Kang, B. Michel, C. Gerber, M. Jaschke, H.-J. Butt and E. Bamberg, *J. Phys. Chem.*, 1995, **99**, 7102–7107.
- 4 D.-W. Li, L.-L. Qu, K. Hu, Y.-T. Long and H. Tian, *Angew. Chemie Int. Ed.*, 2015, **54**, 12758–12761.

### S-1 Figures S1-S10

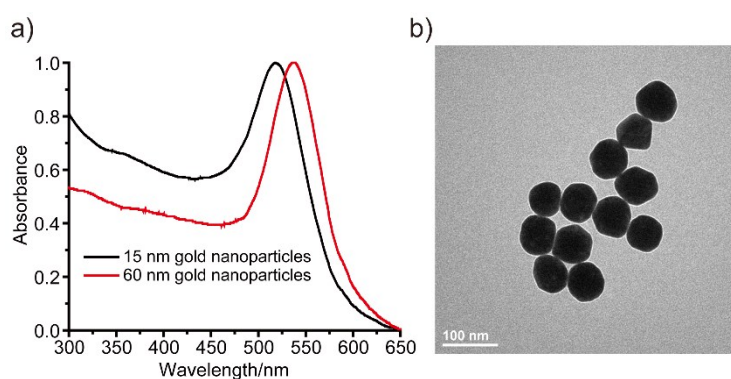

**Figure. S1.** a) UV-Vis spectrum of 14 nm and 60 nm gold nanoparticles; b) TEM image of 60 nm gold nanoparticles.

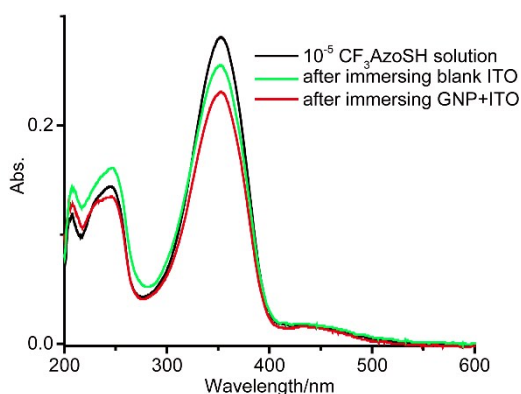

**Figure. S2.** a) UV/Vis spectra of  $\text{CF}_3\text{AzoSH}$  solution before (black line) and after immersing blank ITO (green line), immersing  $n\text{-C}_4\text{H}_9\text{SH}$  modified GNP+ITO (red line).

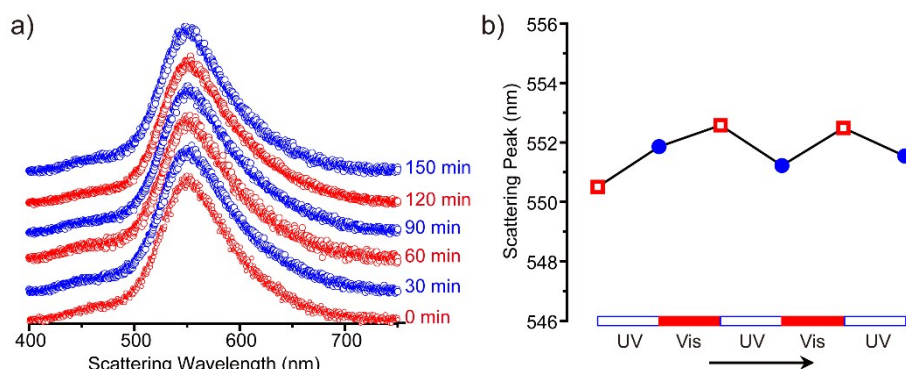

**Figure. S3.** a) The reversible shift of Plasmon resonance Rayleigh scattering spectra of single n-C<sub>4</sub>H<sub>9</sub>SH functionalized GNP (60 nm) obtained at different times upon alternating irradiation with UV and visible light (from bottom to top 0, 30, 60, 90, 120, 150 min). b) The reversible shift of scattering spectra peak of single n-C<sub>4</sub>H<sub>9</sub>SH functionalized GNP (60 nm) upon alternating irradiation with UV and visible light.

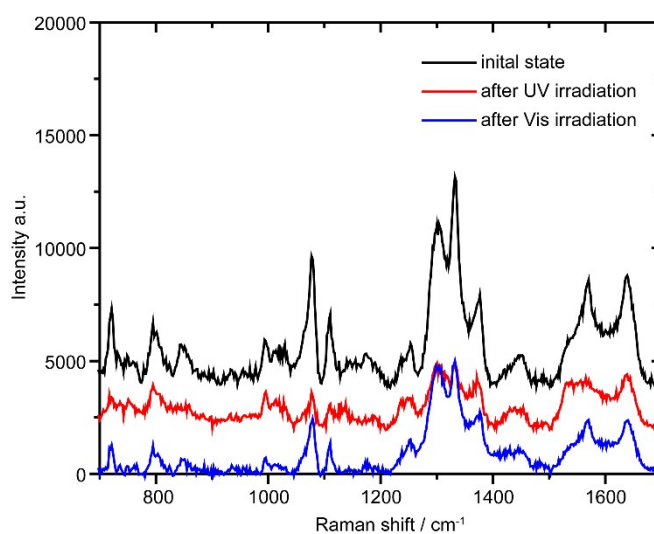

**Figure. S4.** SERS spectra of mix C<sub>4</sub>H<sub>9</sub>SH/CF<sub>3</sub>AzoSH functional AuNPs initial (black line) and after UV irradiation (red line), after Vis irradiation (blue line).

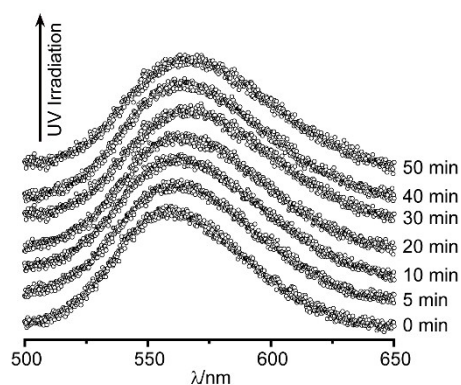

**Figure. S5.** The change of Plasmon resonance Rayleigh scattering spectra of single mix n- $C_4H_9SH/CF_3AzoSH$  functionalized GNP (60 nm) obtained in increasing irradiation time by UV light (from bottom to top 0, 5, 10, 20, 30, 40, 50 min).

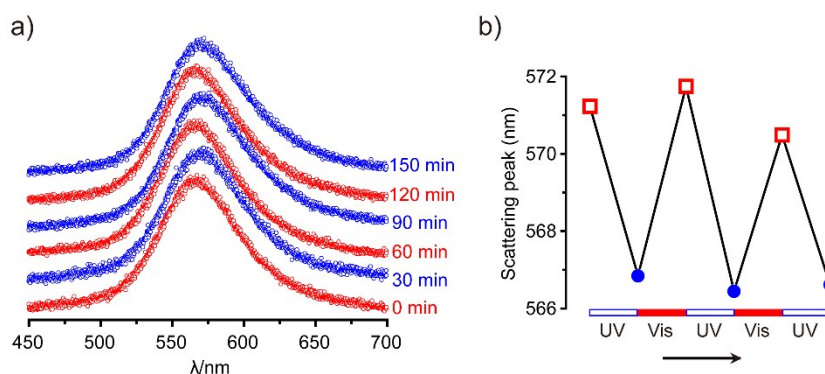

**Figure. S6.** a) The reversible shift of Plasmon resonance Rayleigh scattering spectra of single mix n- $C_4H_9SH/AzoSH$  functionalized GNP (60 nm) obtained at different times upon alternating irradiation by UV and visible light (from bottom to top 0, 30, 60, 90, 120, 150 min). b) The reversible shift of scattering spectra peak of single mix n- $C_4H_9SH/AzoSH$  functionalized GNP (60 nm) obtained at different times upon alternating irradiation by UV and visible light.

**Figure S7~S11 are the  $^1H$  NMR,  $^{13}C$  NMR and MS characterization of target compound and Intermediate**

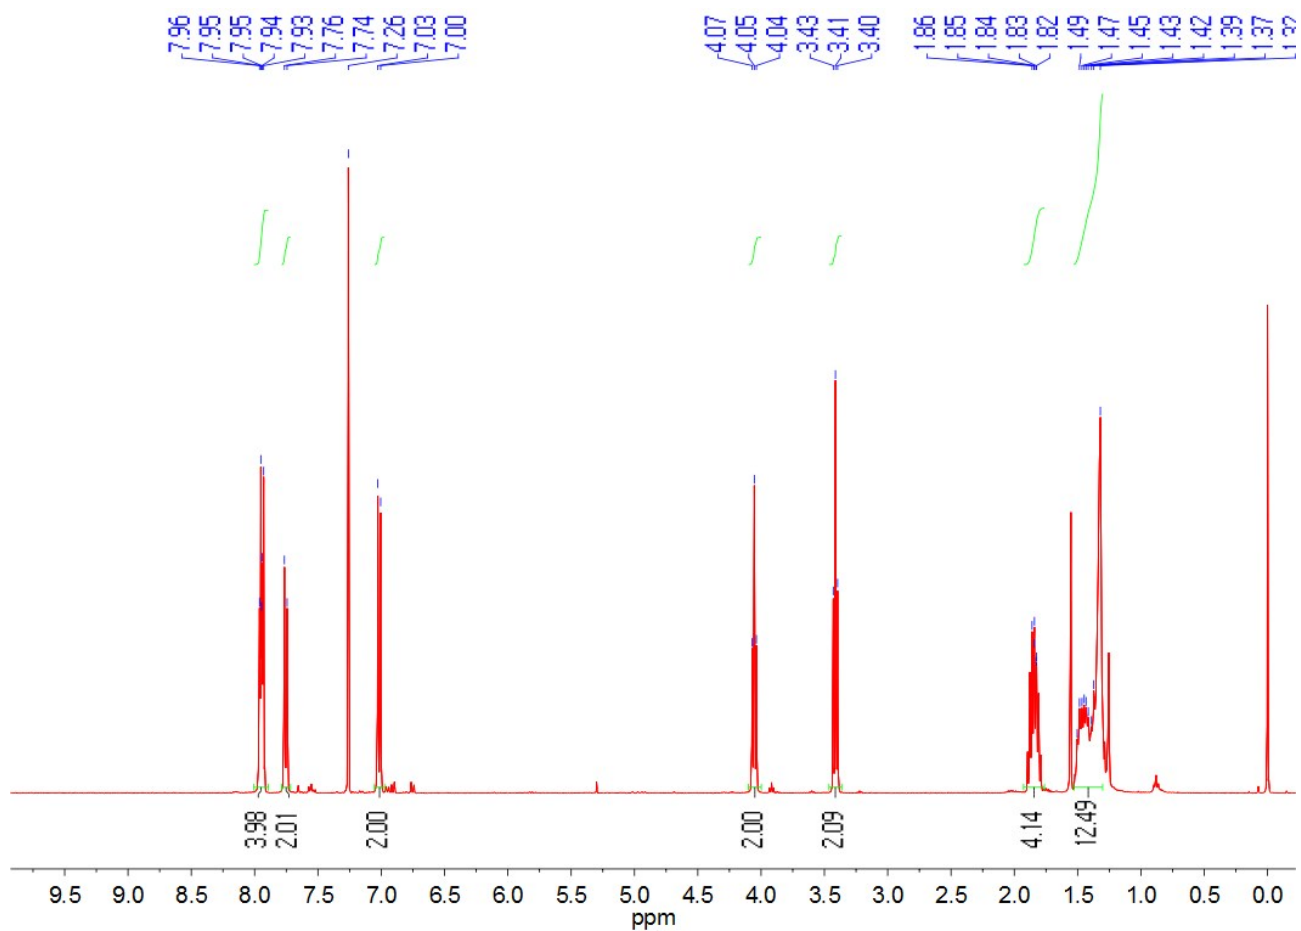

**Figure. S7.**  $^1\text{H}$  NMR spectrum of [4-(10-bromo-decyloxy)-phenyl]-(4-trifluoromethyl-phenyl)-diazene (2).



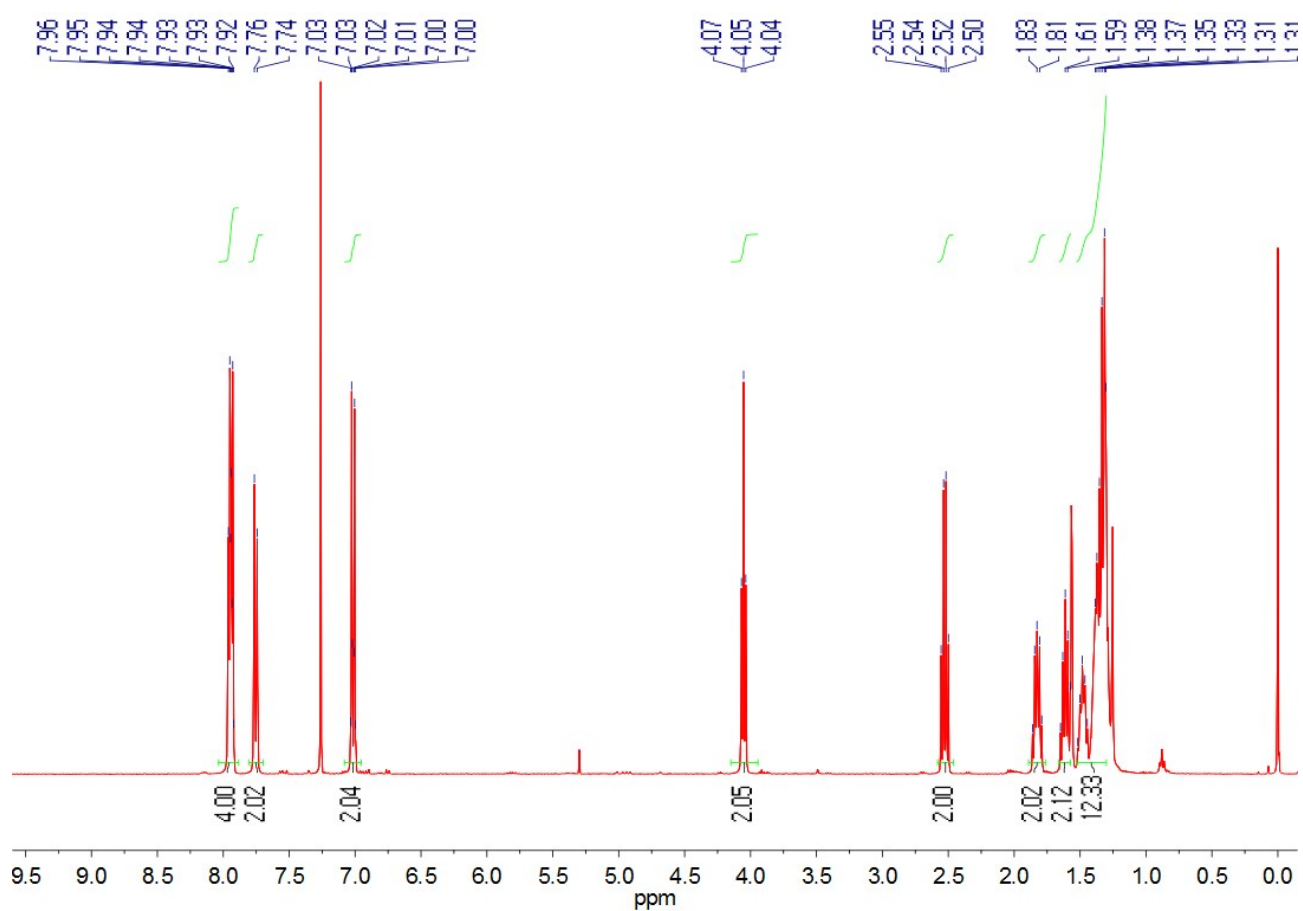

**Figure. S8.** <sup>1</sup>H NMR spectrum of 10-[4-(4-trifluoromethyl-phenylazo)-phenoxy]-decane-1-thiol (3).

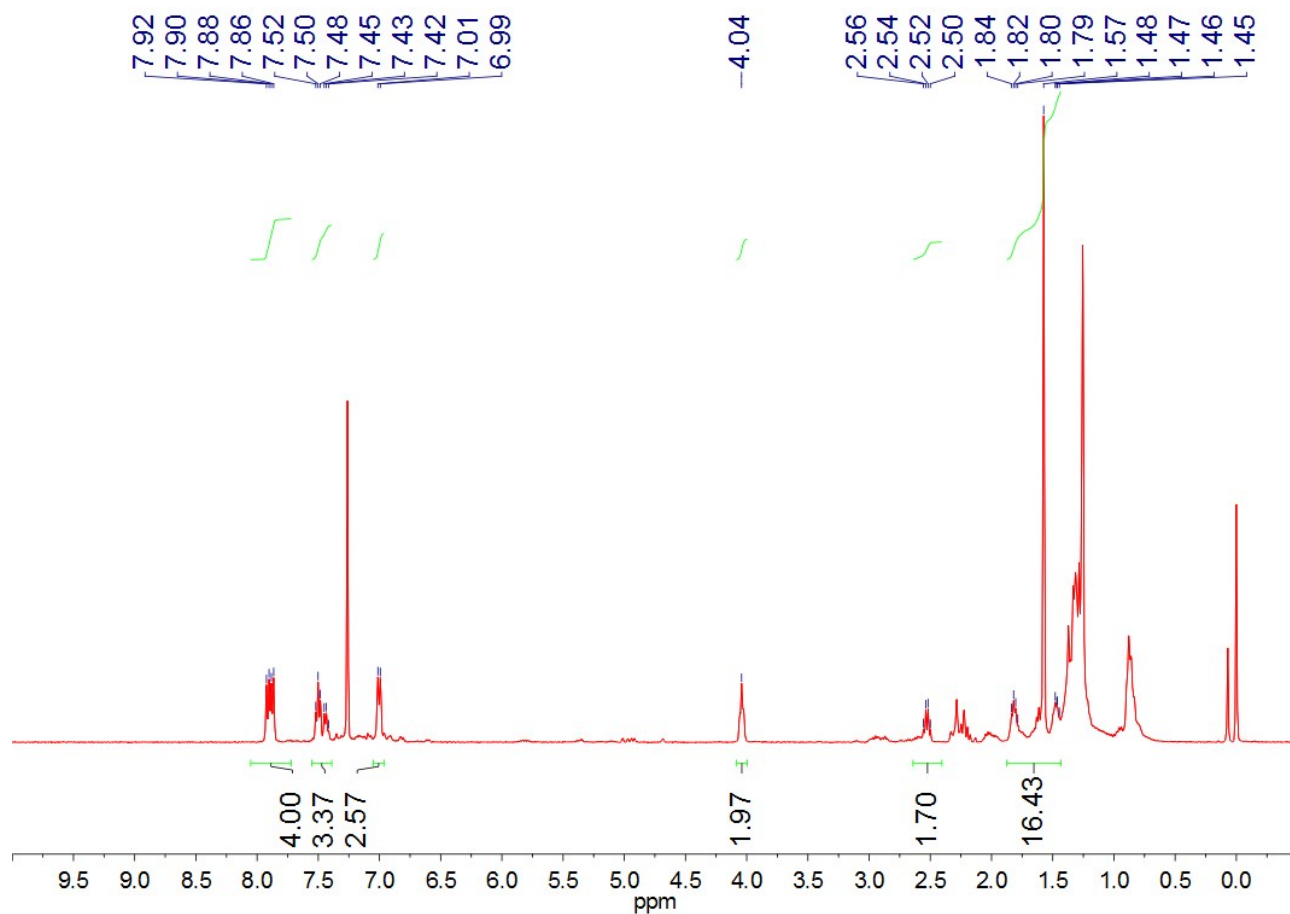

**Figure. S9.**  $^1\text{H}$  NMR spectrum of 10-(4-phenylazo-phenoxy)-decane-1-thiol.

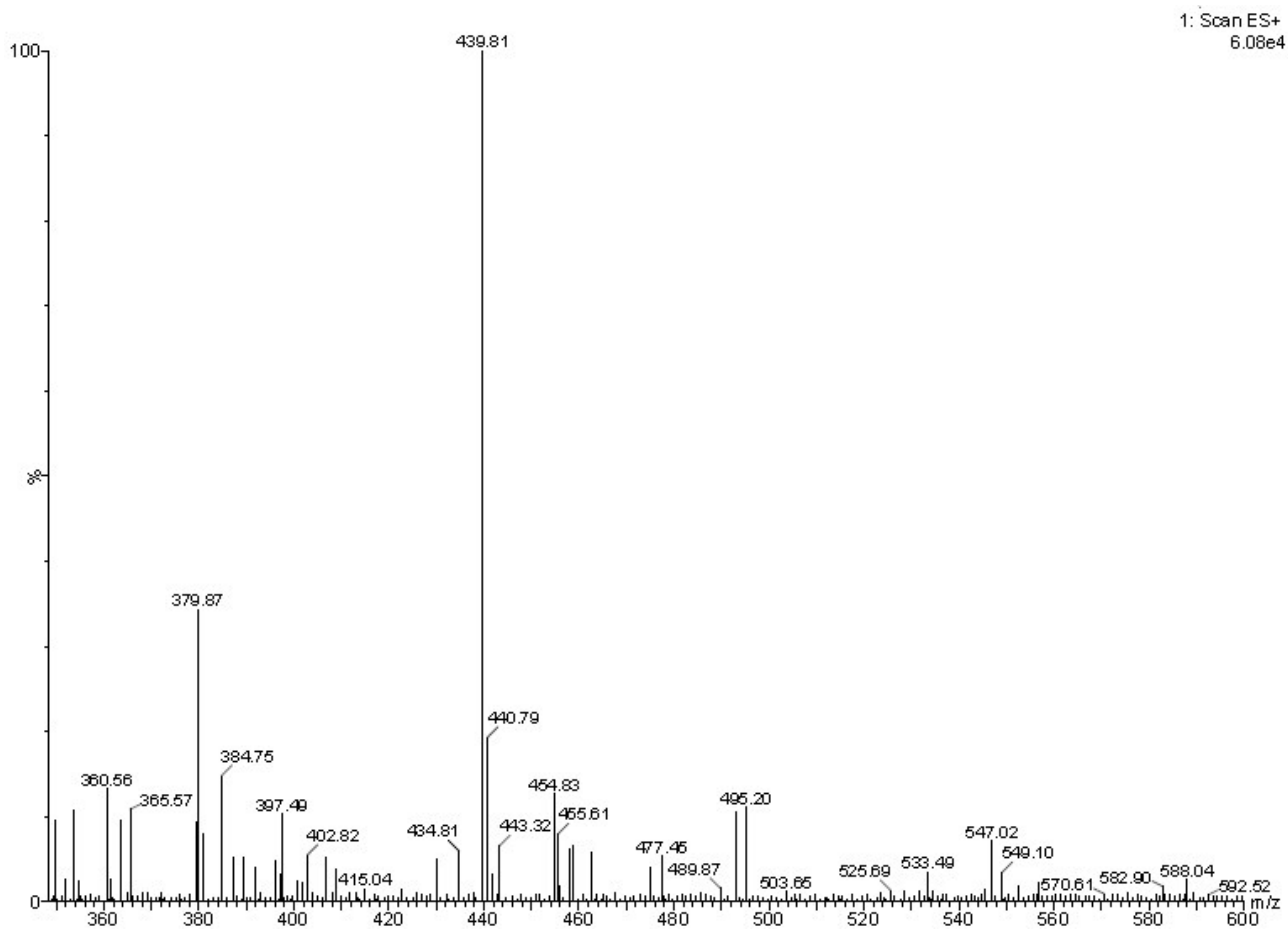

**Figure. S10.** Mass spectrum (ESI<sup>+</sup>) of 10-[4-(4-trifluoromethyl-phenylazo)-phenoxy]-decane-1-thiol (3).

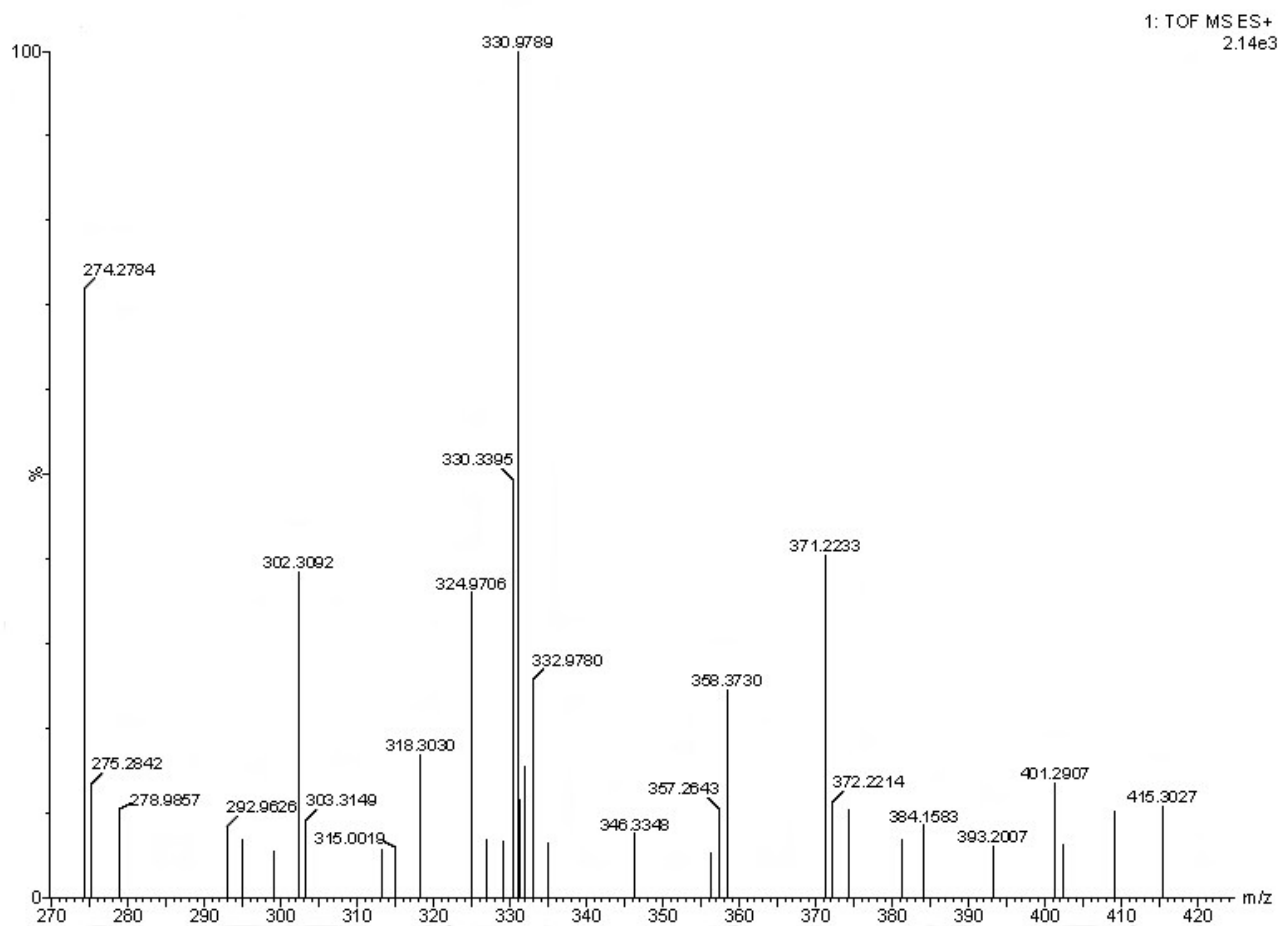

**Figure. S11.** Mass spectrum (HESI<sup>+</sup>) of 10-(4-phenylazo)-phenoxy]-decane-1-thiol.
